# Supplementary material for: Thermal-induced interface degradation in perovskite light-emitting diodes
Source: Royal Society of Chemistry journal article supplement (doi:10.1039/d0tc03816d), 2020-01-01
Supplement: d0tc03816d1.pdf [file d0tc03816d1.pdf]

## Supporting Information

### Thermal-induced interface degradation in perovskite light-emitting diodes

Yatao Zou<sup>a,b</sup>, Tian Wu<sup>a</sup>, Fan Fu<sup>c</sup>, Sai Bai<sup>b\*</sup>, Lei Cai<sup>a</sup>, Zhongcheng Yuan<sup>b</sup>, Yajuan Li<sup>a</sup>, Ruiying Li<sup>a</sup>, Weidong Xu<sup>b</sup>, Tao Song<sup>a</sup>, Yingguo Yang<sup>d</sup>, Xingyu Gao<sup>d</sup>, Feng Gao<sup>b\*</sup>, Baoquan Sun<sup>a\*</sup>

<sup>a</sup>Jiangsu Key Laboratory for Carbon-Based Functional Materials & Devices, Institute of Functional Nano & Soft Materials (FUNSOM) and Collaborative Innovation Center of Suzhou Nano Science and Technology, Soochow University, 199 Ren'ai Road, Suzhou 215123, People's Republic of China

<sup>b</sup>Department of Physics, Chemistry and Biology (IFM), Linköping University, SE-581 83 Linköping, Sweden

<sup>c</sup>Laboratory for Thin Films and Photovoltaics, Empa-Swiss Federal Laboratories for Materials Science and Technology, Ueberlandstrasse 129, 8600, Duebendorf, Switzerland

<sup>d</sup>Shanghai Synchrotron Radiation Facility (SSRF), Shanghai Institute of Applied Physics, Chinese Academy of Sciences, 239 Zhangheng Road, Pudong New Area, Shanghai 201204, China

#### Corresponding Author

\*Corresponding Author: sai.bai@liu.se; feng.gao@liu.se; bqsun@suda.edu.cn

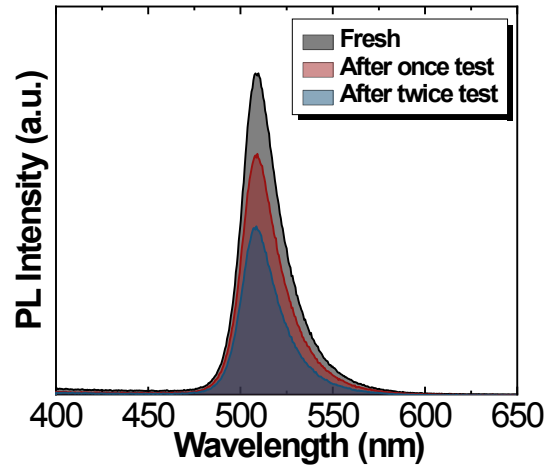

**Fig. S1** PL intensity of perovskite films with different testing cycles.

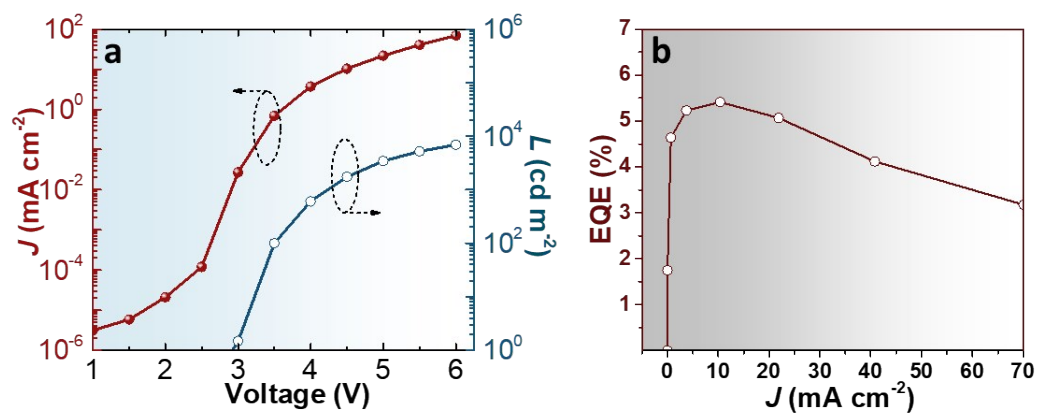

**Fig. S2** Device performance of a PeLED after two scans from 0-6 V. (a) *J-V-L* curve. (b) *EQE-J* curve. The LED was tested in ambient (temperature, 30 °C; humidity, 60%) with epoxy encapsulation.

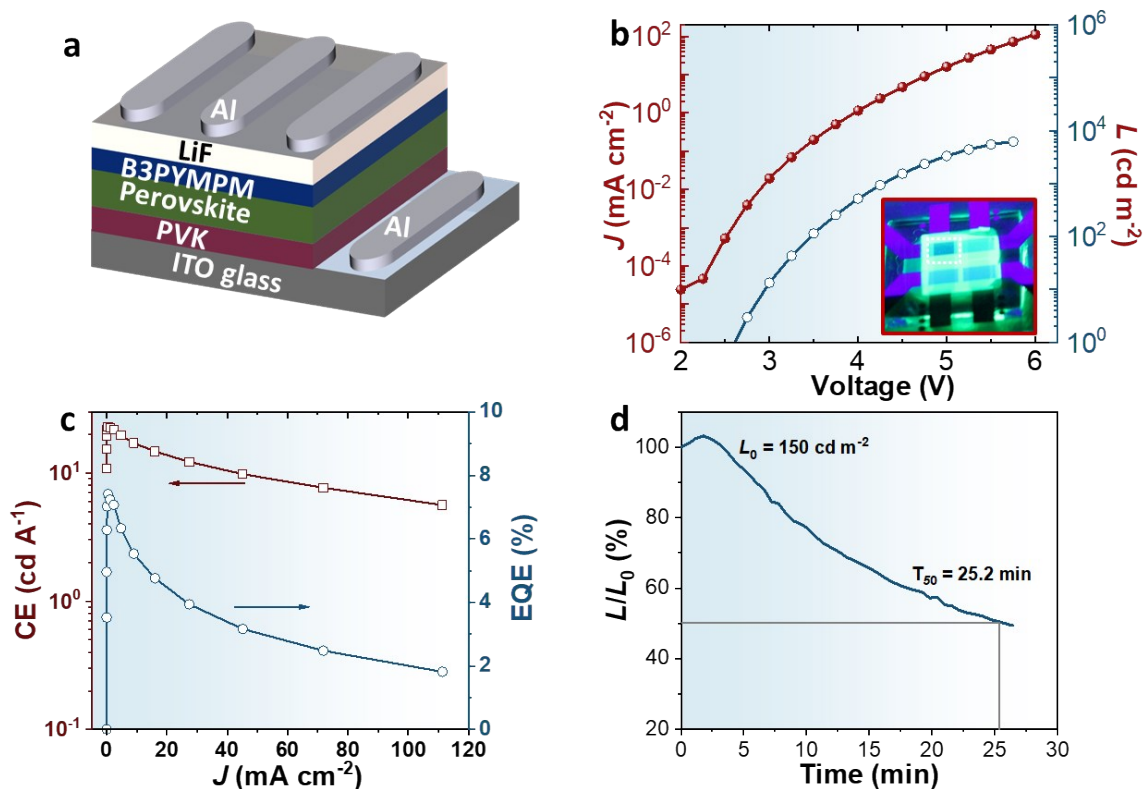

**Fig. S3** Device performance of PeLED with B3PYMPM as ETL. (a) Schematic device structure. (b)  $J$ - $V$ - $L$  curve, the pixel in dash white rectangle has been scanned from 0 to 6 V. (c)  $EQE$ - $J$  curve. (d) Operational lifetime measurement with an initial luminescence of approximately 150 cd m<sup>-2</sup>. The LED was tested in ambient (temperature, 30 °C; humidity, 60%) with epoxy encapsulation.

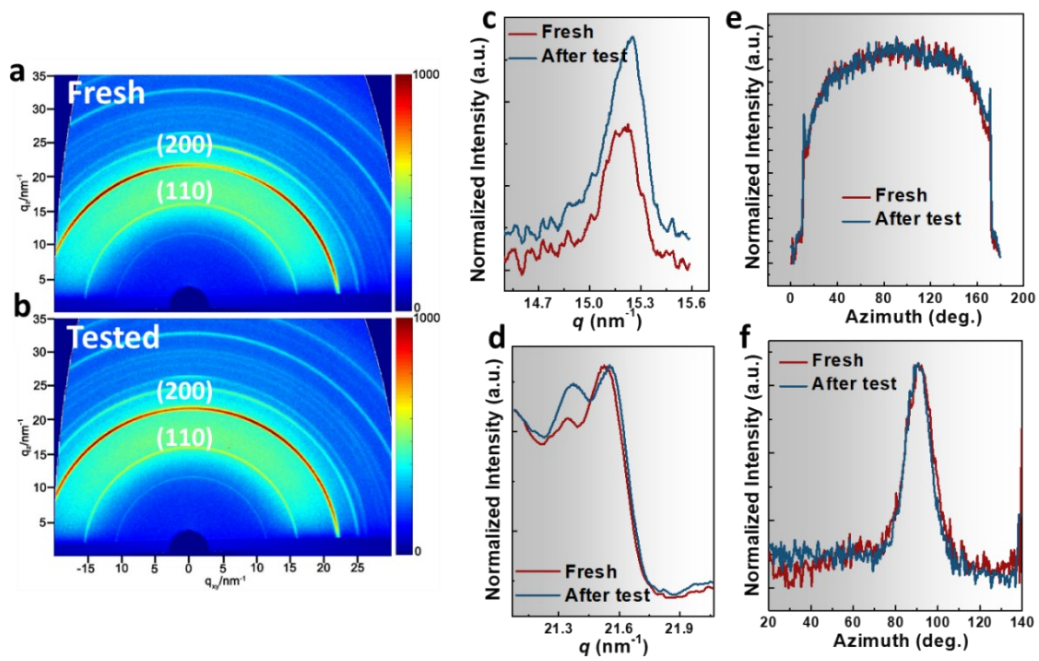

**Fig. S4** GIXRD measurement of perovskite film in (a) fresh device and (b) bias tested device. Crystallinity (c) and orientation (e) analysis of (110) plane of perovskite films. Crystallinity (d) and orientation (f) analysis of (200) plane of perovskite films.

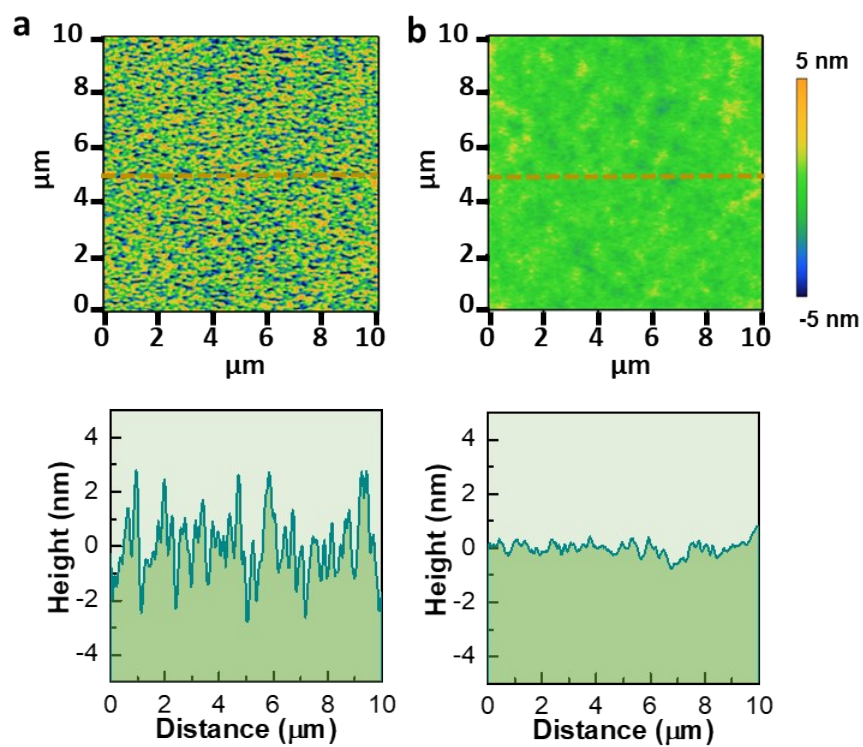

**Fig. S5** Morphology of TPBi films deposited on ITO/PVK substrate. (a) Without annealing. (b) Annealed at 100 °C for 5 min. The bottom images are the corresponding line-scan profile in AFM height images.

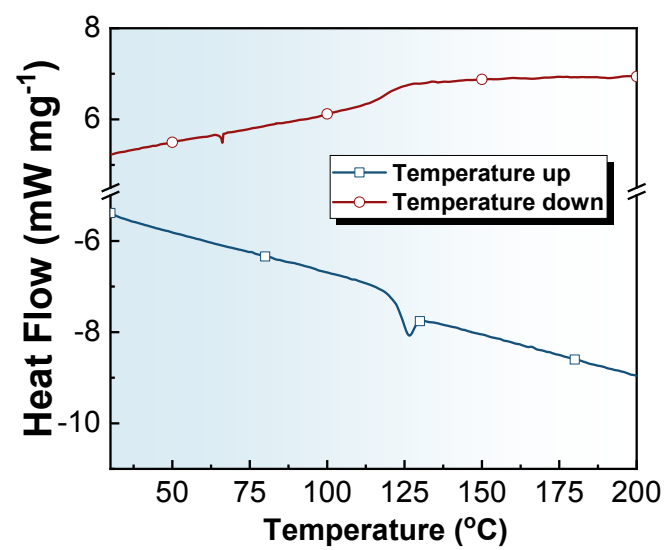

**Fig. S6** Differential thermal analysis spectra of TPBi powder.

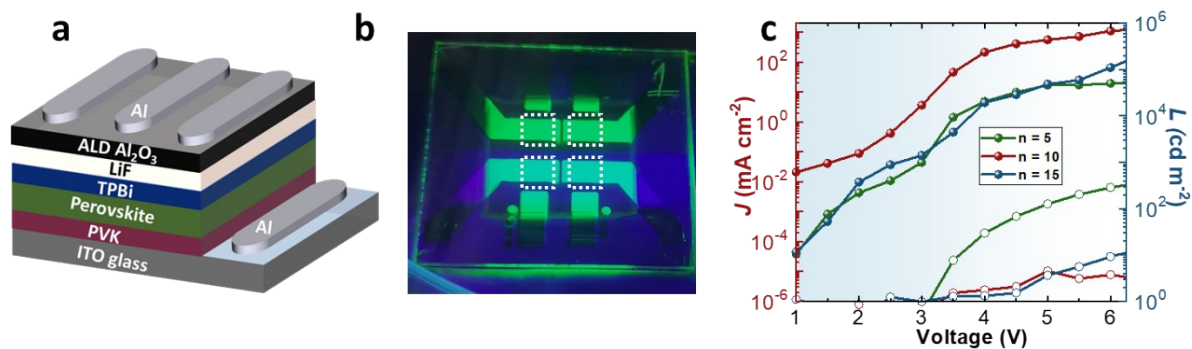

**Fig. S7** Device performance of PeLED with thin ALD Al<sub>2</sub>O<sub>3</sub> layer on the top of TPBi layer. (a) Schematic device structure. (b) A completed PeLED device with ALD Al<sub>2</sub>O<sub>3</sub> annealed at 100 °C for 5 min. The white dash rectangles show the four active pixel. (c) *J-V-L* curve. *n* represents the ALD cycle for Al<sub>2</sub>O<sub>3</sub> layer, film with one cycle ALD is estimated to be approximately 0.1 nm. The LEDs were tested in ambient (temperature, 30 °C; humidity, 60%) with epoxy encapsulation.
